# Supplementary material
Source: PubMed Central journal article supplement (PMC9618171)

**Supplemental Figure 1.** Self-Report of CKD Over Survey Cycles, 1999-2014

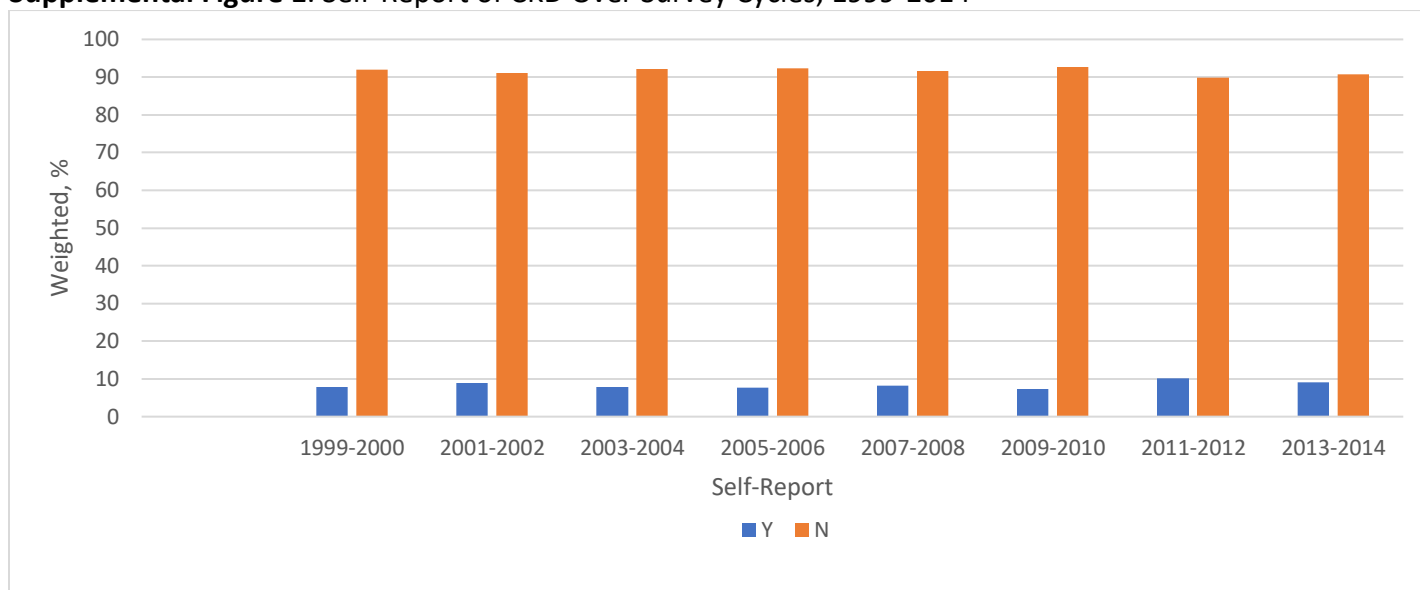

Supplement: supplemental_figure_1_fdab112.pdf [file supplemental_figure_1_fdab112.pdf]
